# Supplementary material for: Integrated Proteomic and Phosphoproteomics Analysis of DKK3 Signaling Reveals Activated Kinase in the Most Aggressive Gallbladder Cancer
Source: MDPI journal article supplement (doi:10.3390/cells10030511), 2021-02-28

# Supplementary Figure S1

A

TGBC24TKB

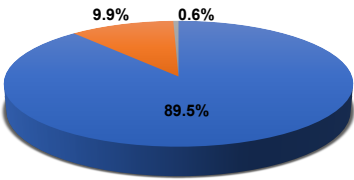

- Phospho modification at Serine
- Phospho modification at Threonine
- Phospho modification at Tyrosine

B

OCUG-1

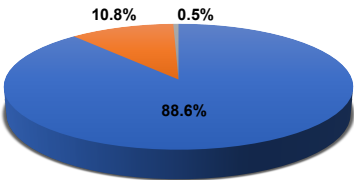

- Phospho modification at Serine
- Phospho modification at Threonine
- Phospho modification at Tyrosine

C

G-415

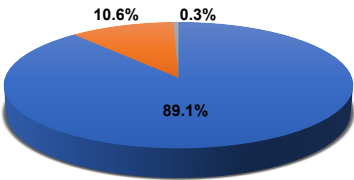

- Phospho modification at Serine
- Phospho modification at Threonine
- Phospho modification at Tyrosine

Supplementary Figure S2

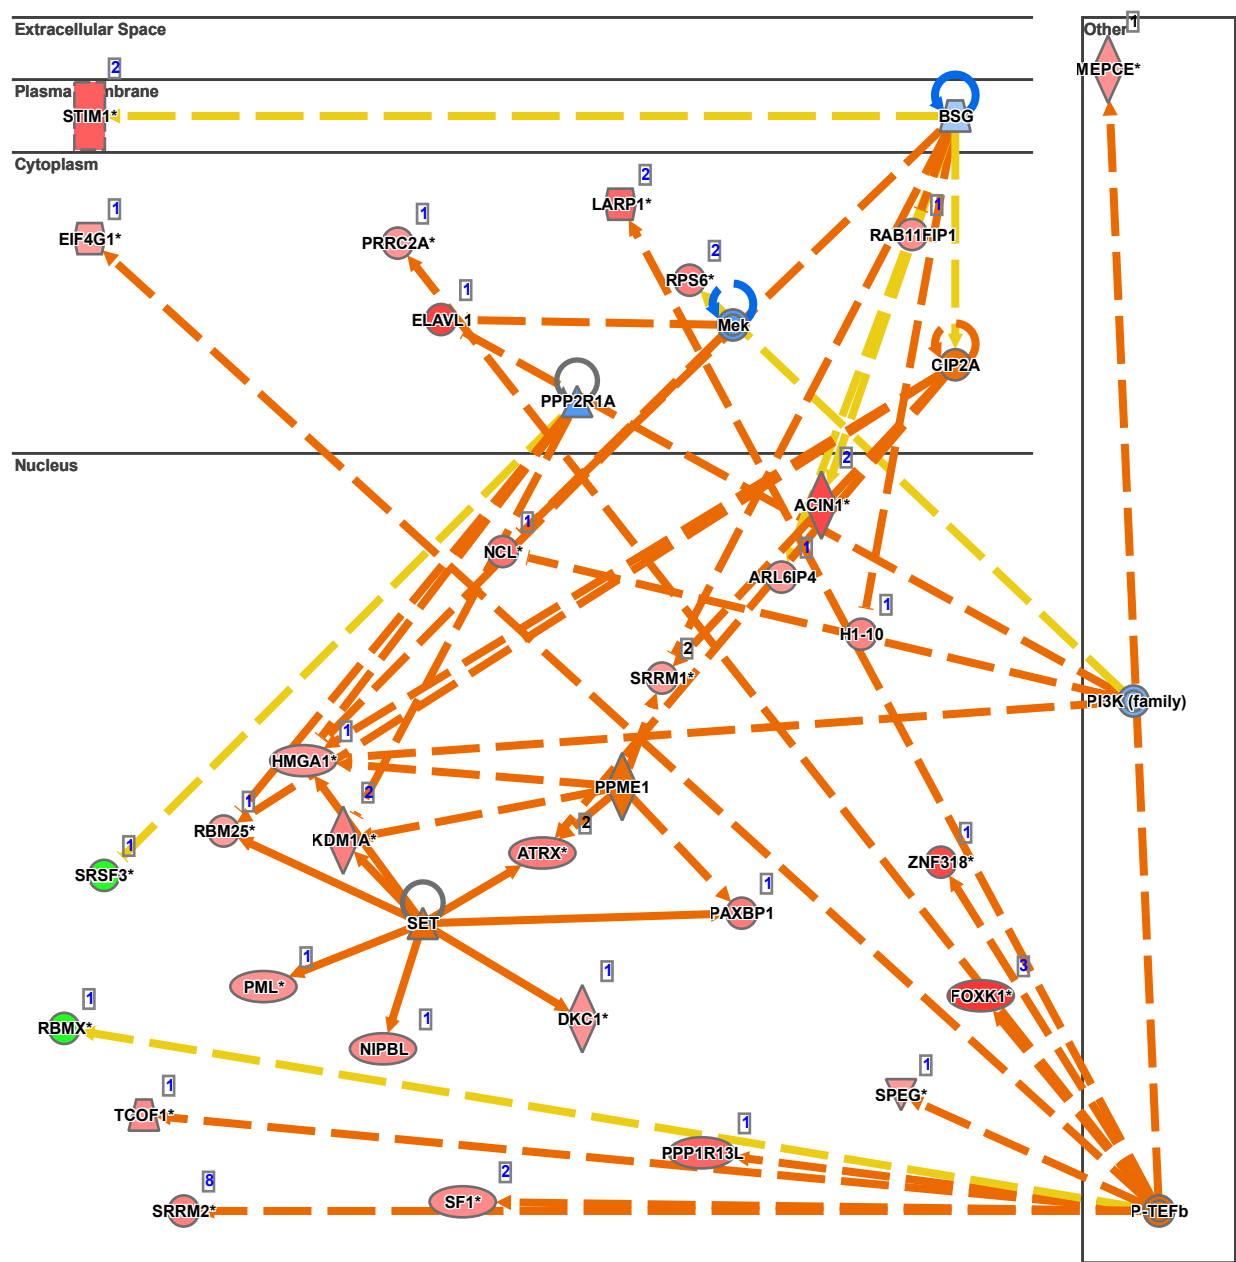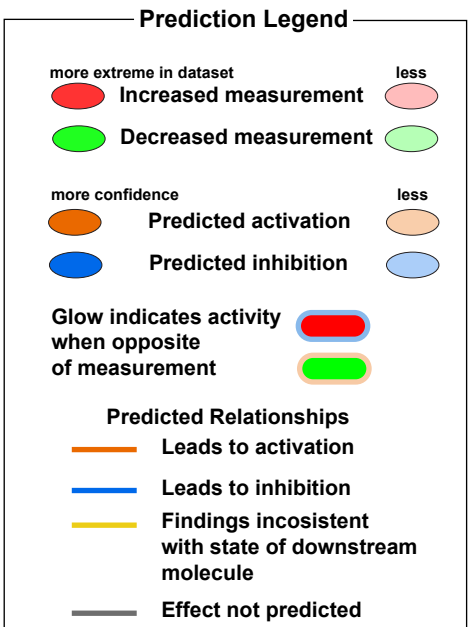

Supplementary Figure S3

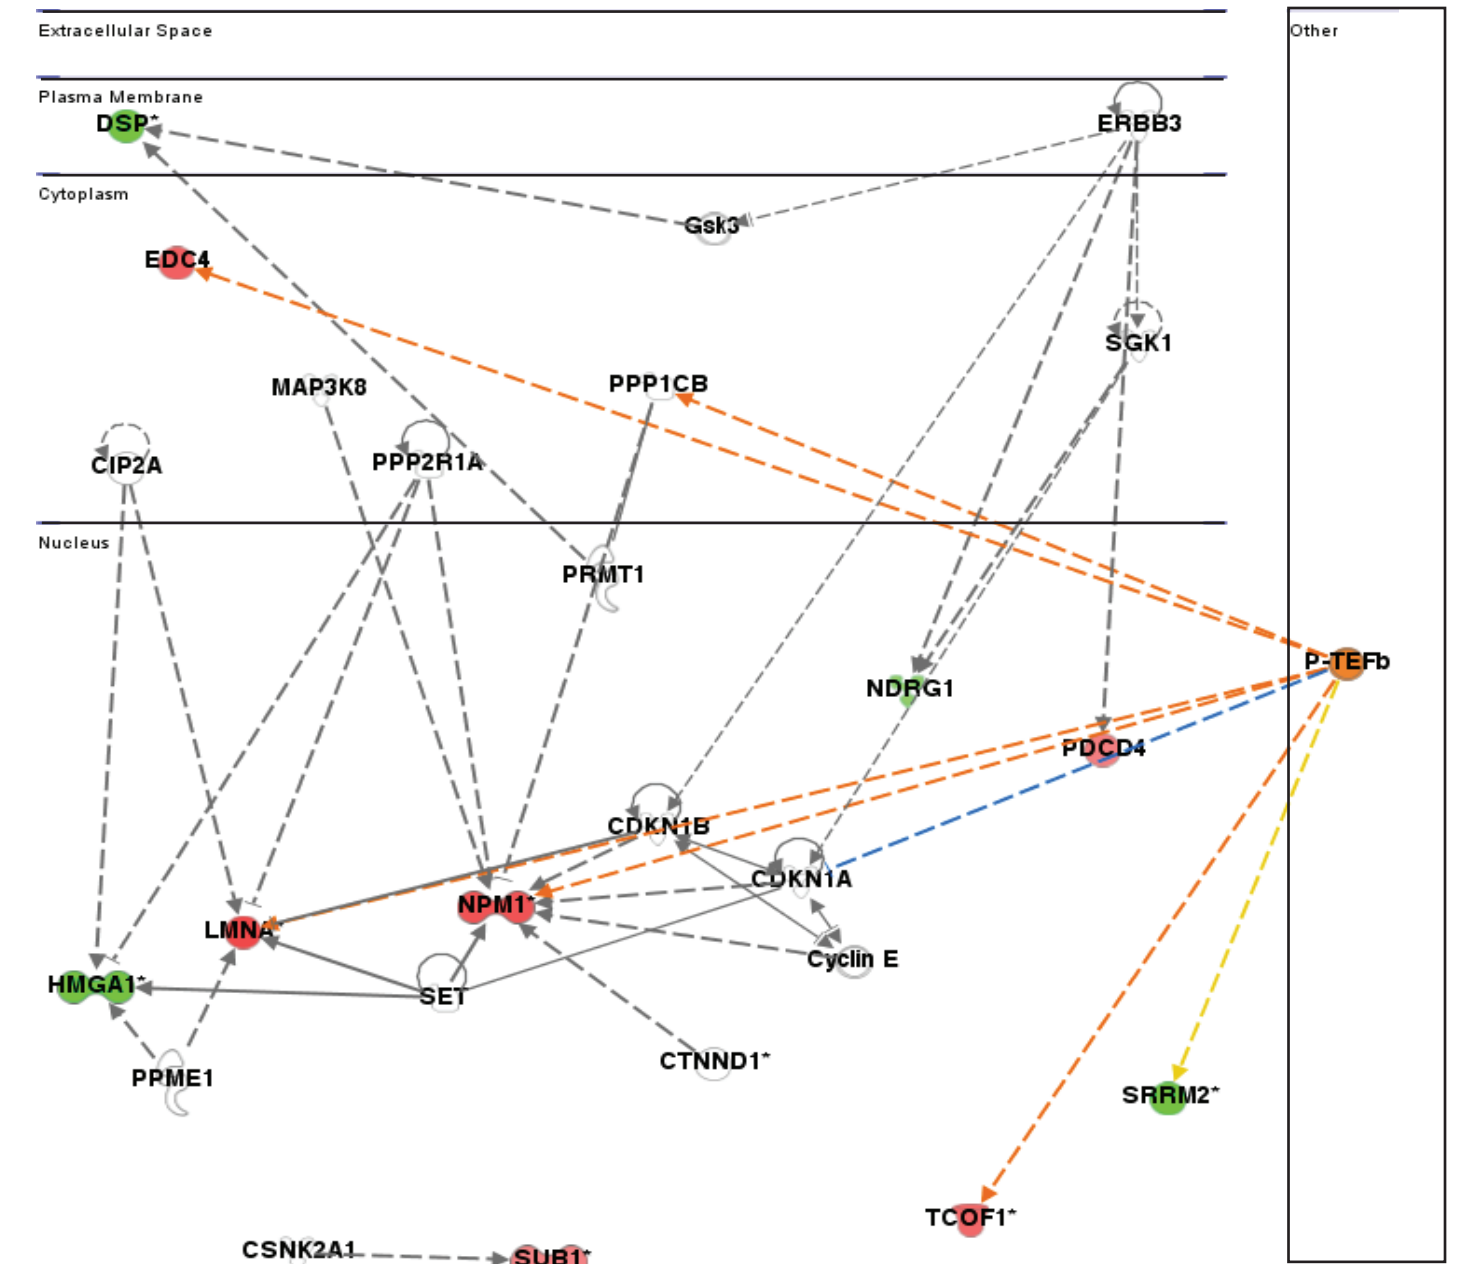

Supplementary Figure S4

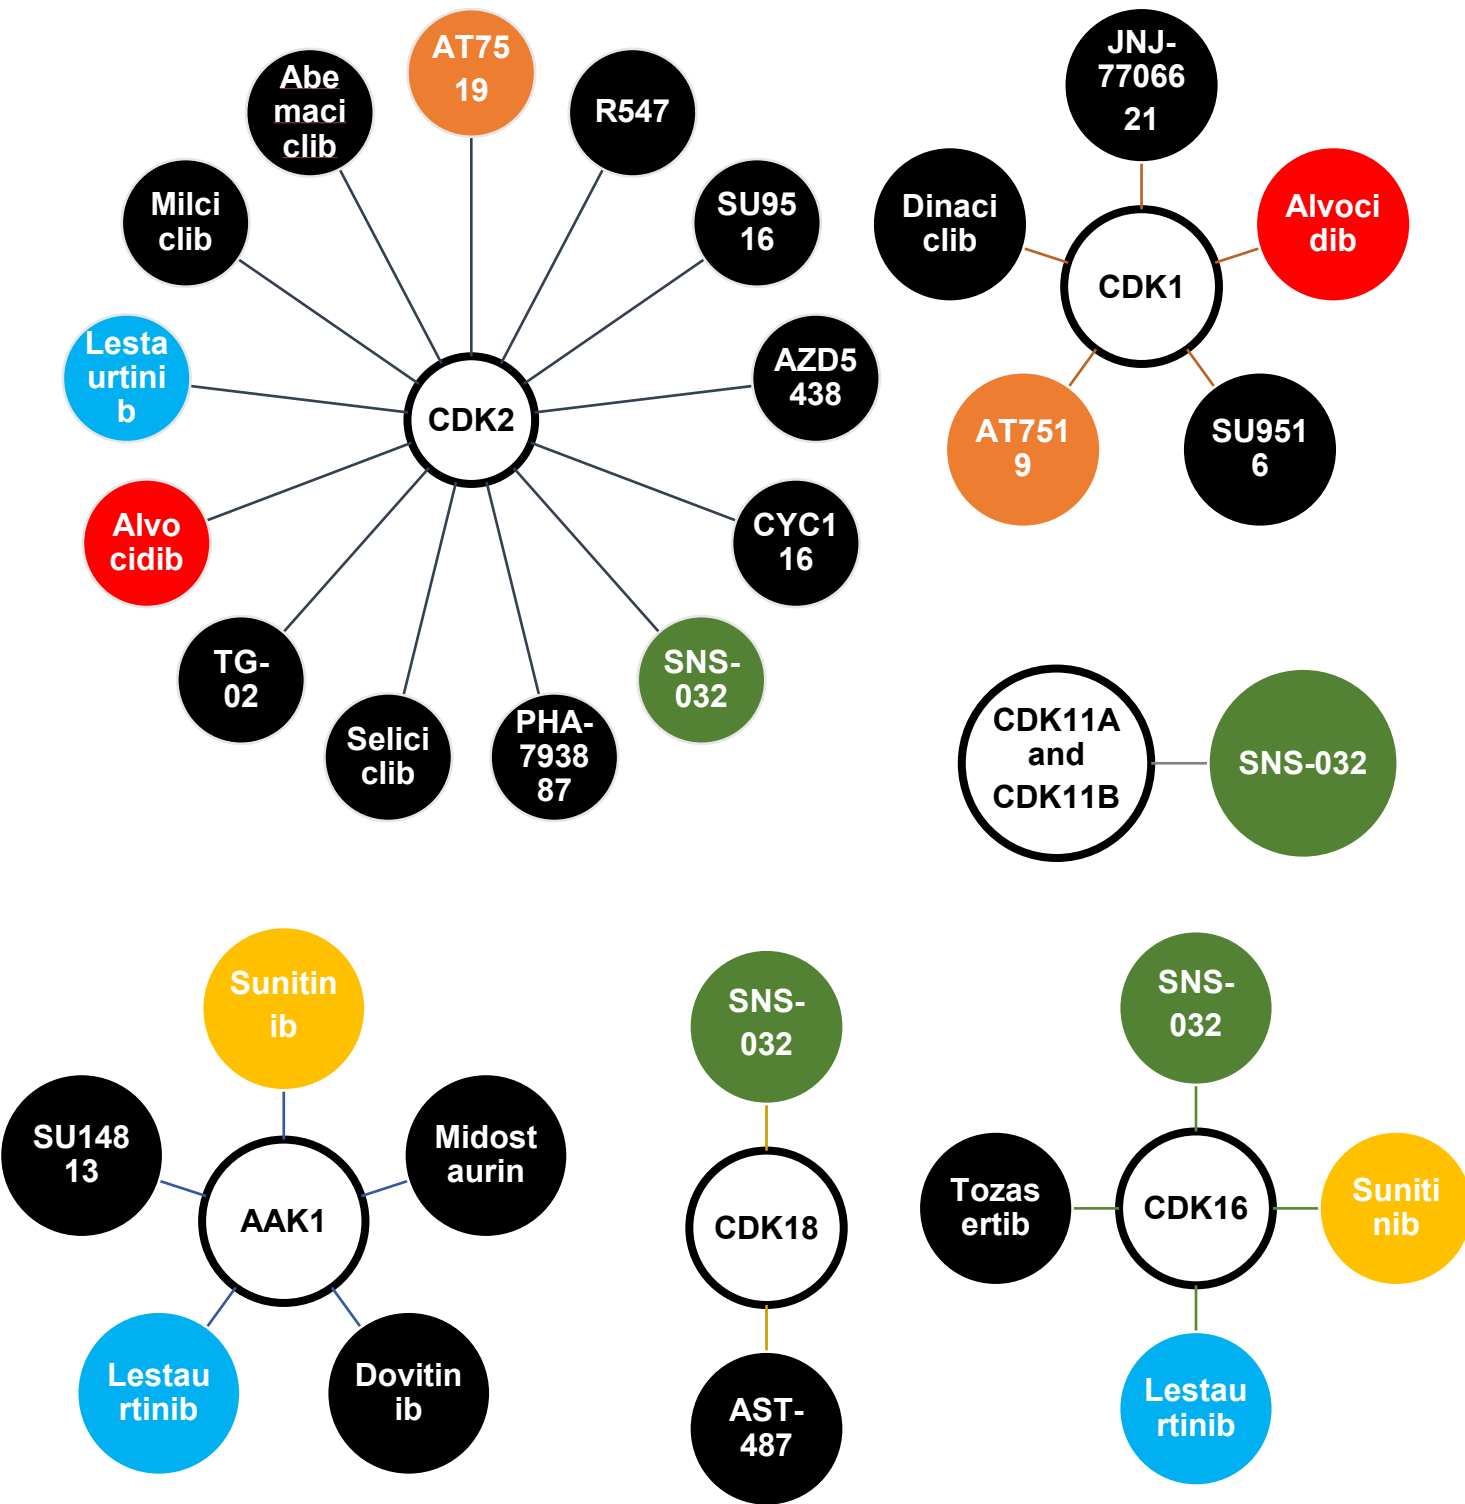

Supplement: s1 [file s1]
